# Supplementary material for: Staphylococcus aureus FtsZ and PBP4 bind to the conformationally dynamic N-terminal domain of GpsB
Source: eLife journal article supplement (doi:10.7554/elife.85579), 2024-04-16

**A**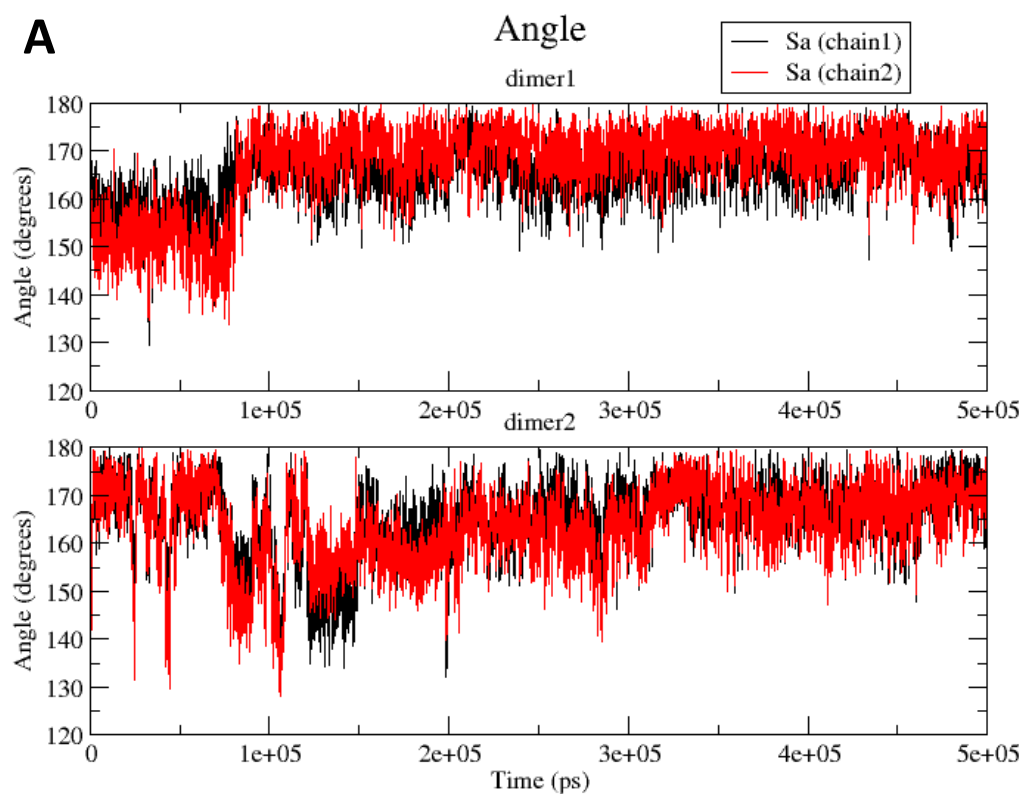**B**

4UG1 (*B. subtilis* GpsB)  
*S. aureus* GpsB  $\Delta$ MAD  
*S. aureus* GpsB  $\Delta$ MNN

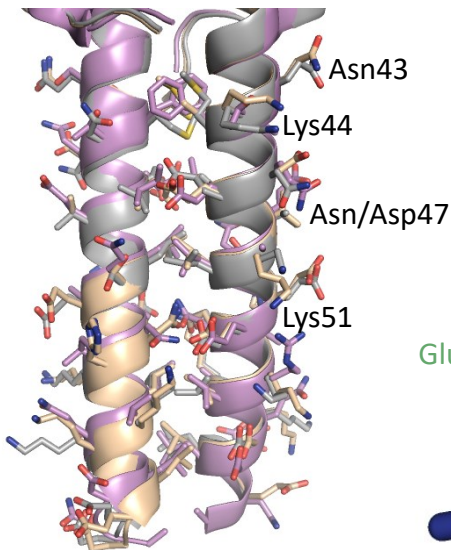**C**

*S. aureus* GpsB WT  
*S. aureus* GpsB  $\Delta$ MNN

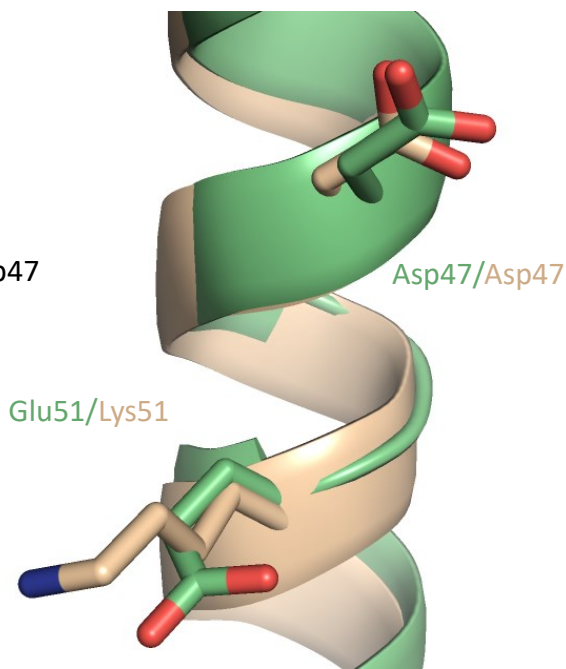

Supplement: supp [file elife-85579-supp-v1.zip]
