# Supplementary figures and images for: Staphylococcus aureus FtsZ and PBP4 bind to the conformationally dynamic N-terminal domain of GpsB
Source: eLife journal article supplement (doi:10.7554/elife.85579), 2024-04-16

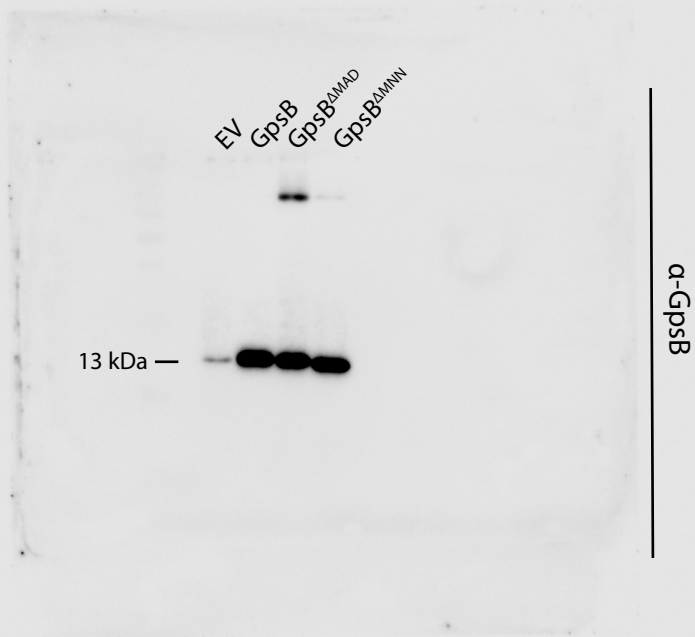

Supplement: supp [file elife-85579-supp-v1.zip]

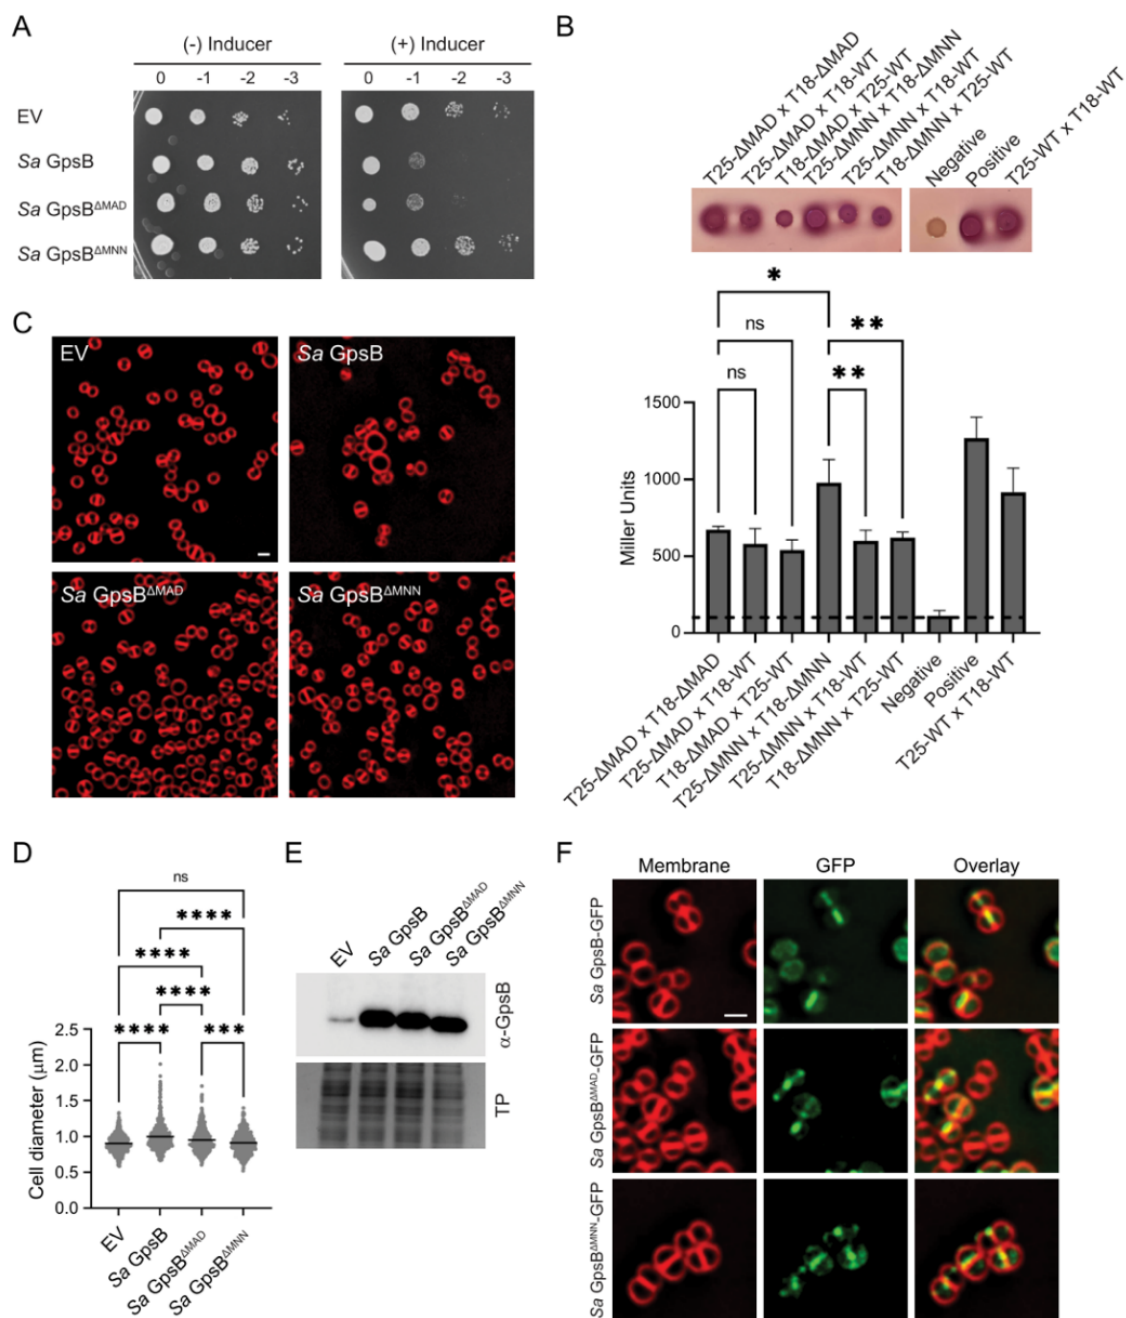

Supplement: supp [file elife-85579-supp-v1.zip]

# SPR Titration of *Sa* FtsZ/PBP4 C-terminal peptides against *Sa* GpsB $\Delta$ MAD GpsB

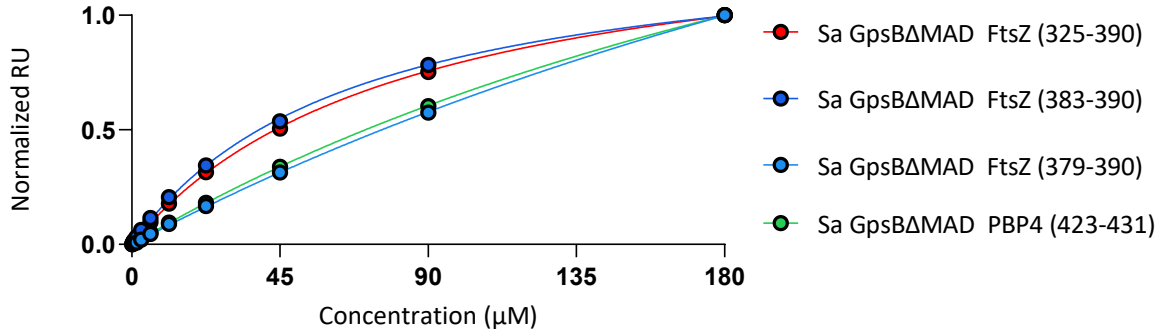

Supplement: supp [file elife-85579-supp-v1.zip]

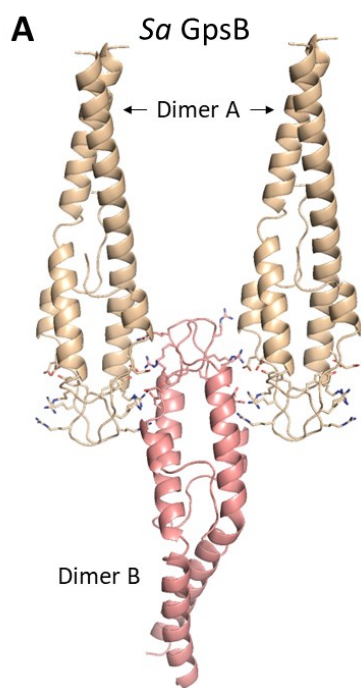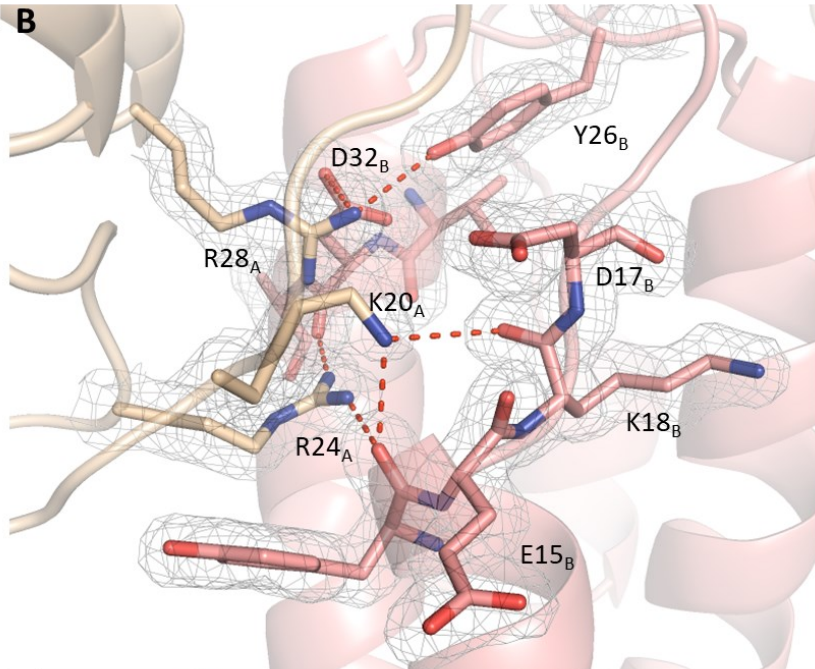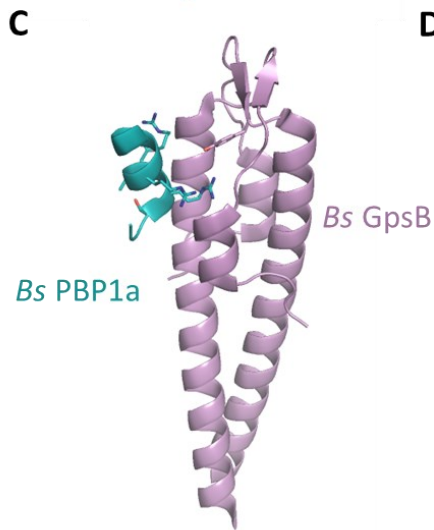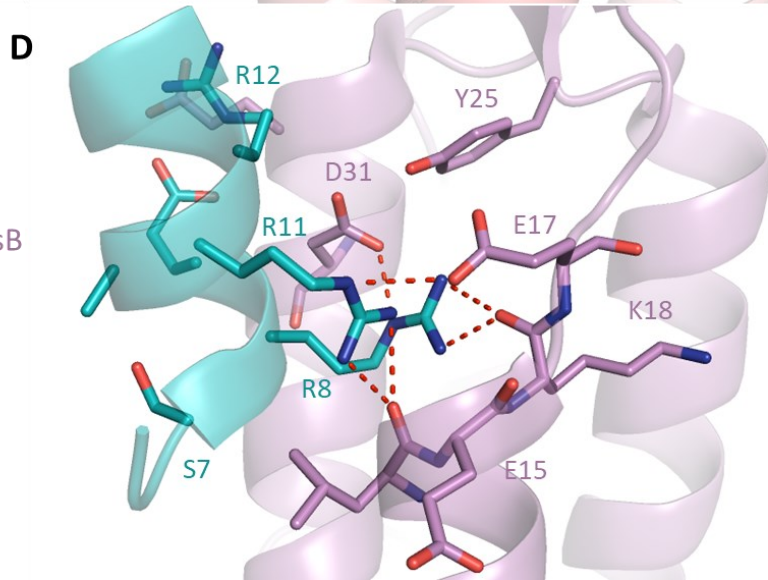

Supplement: supp [file elife-85579-supp-v1.zip]

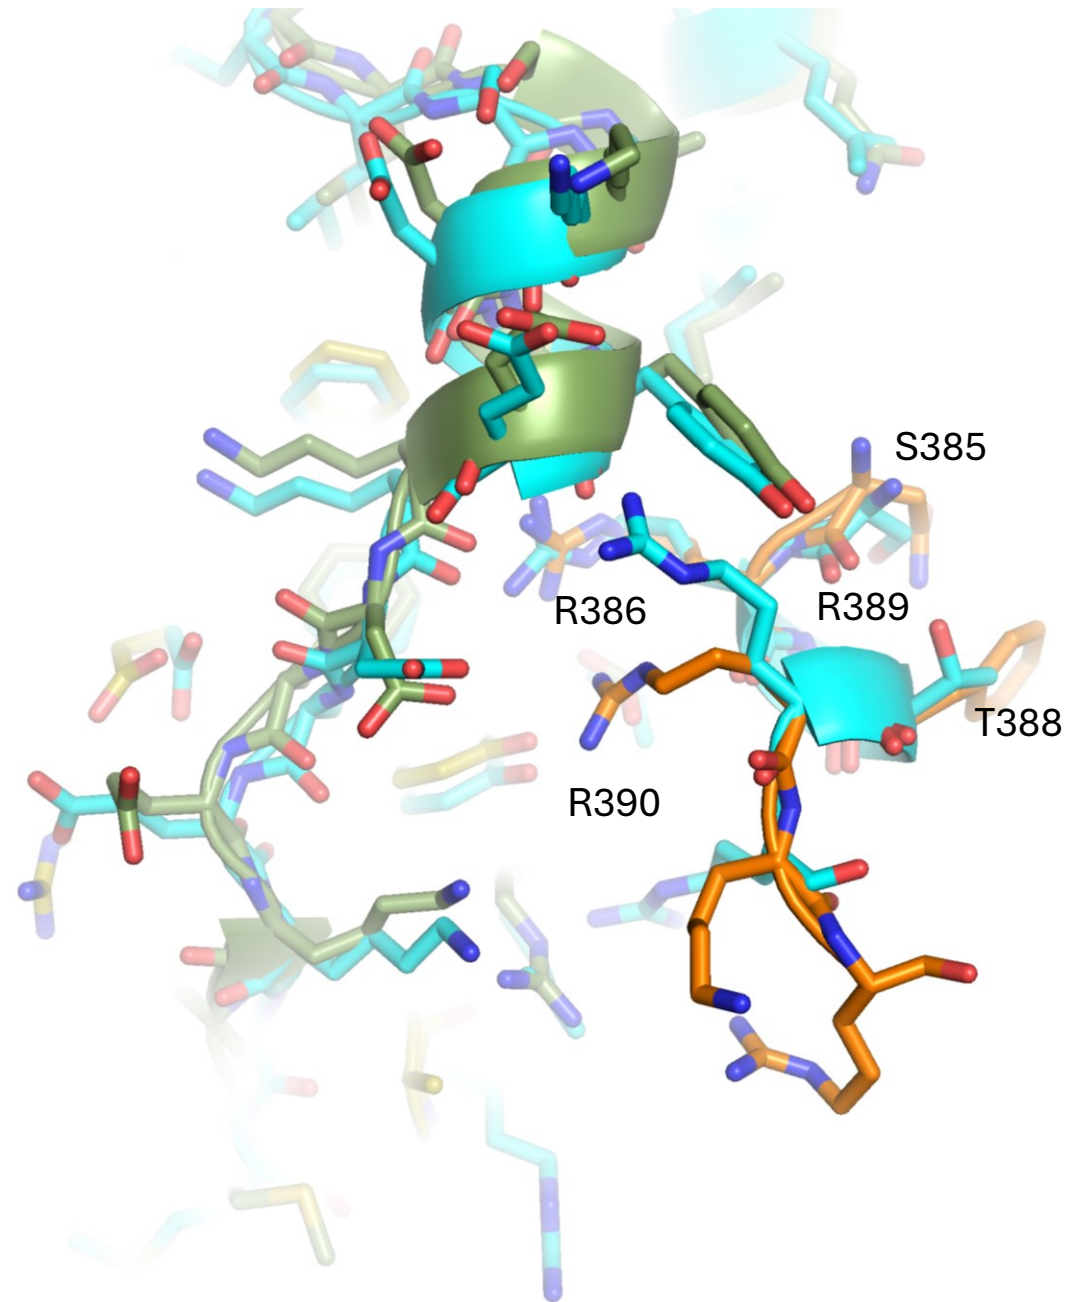

Supplement: supp [file elife-85579-supp-v1.zip]

**A**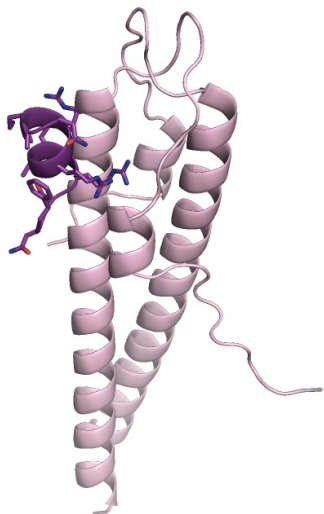**B**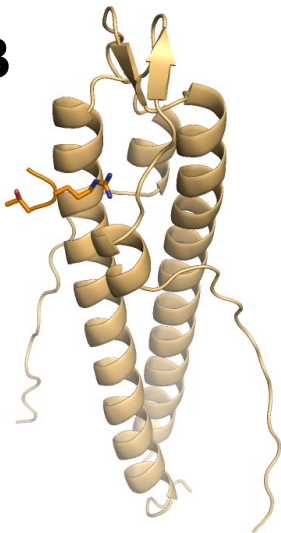**C**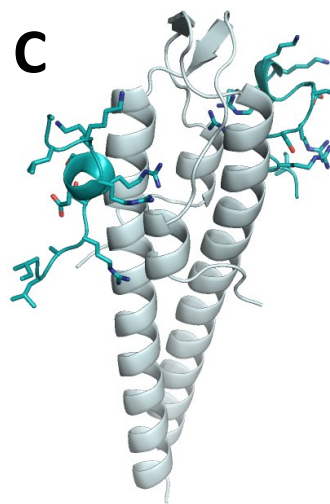**D**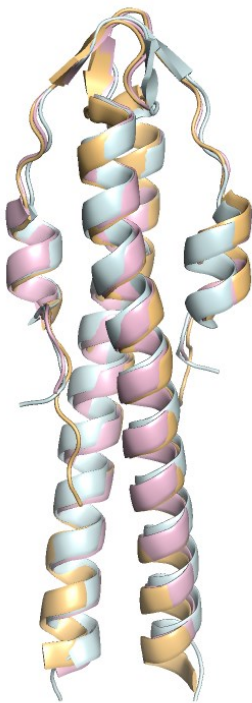**E**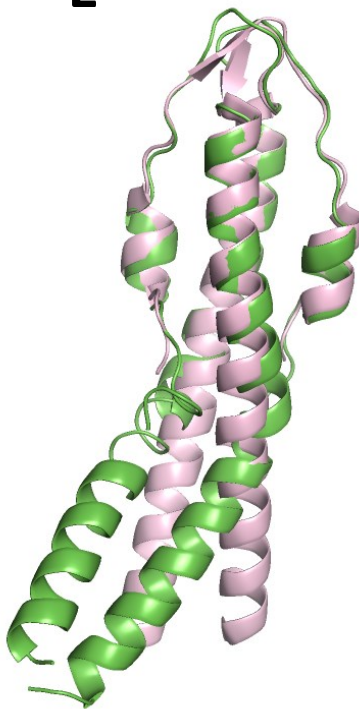

Supplement: supp [file elife-85579-supp-v1.zip]

**A**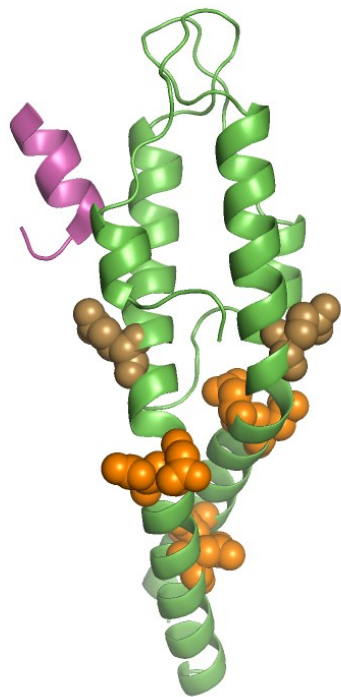**B**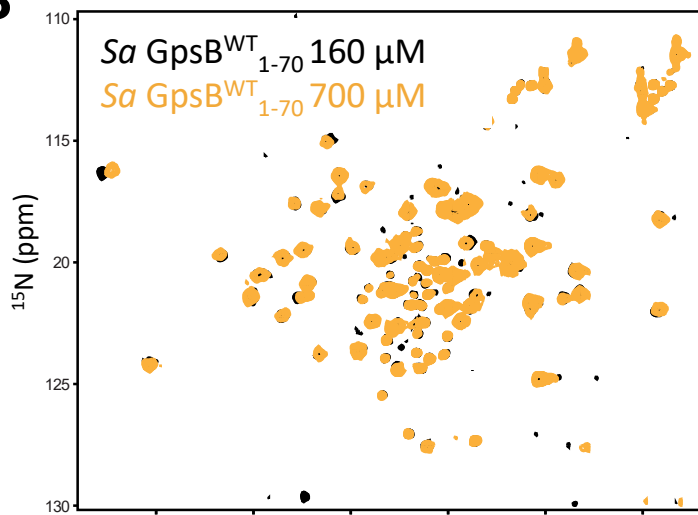**C**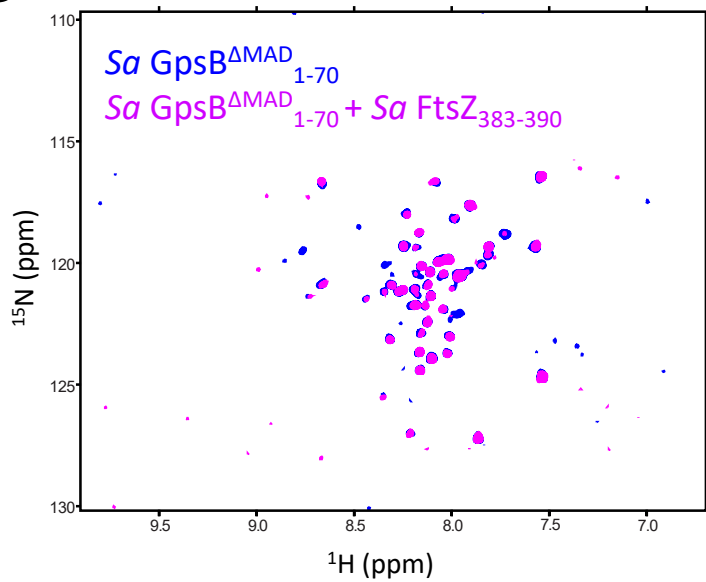

Supplement: supp [file elife-85579-supp-v1.zip]

Total Protein

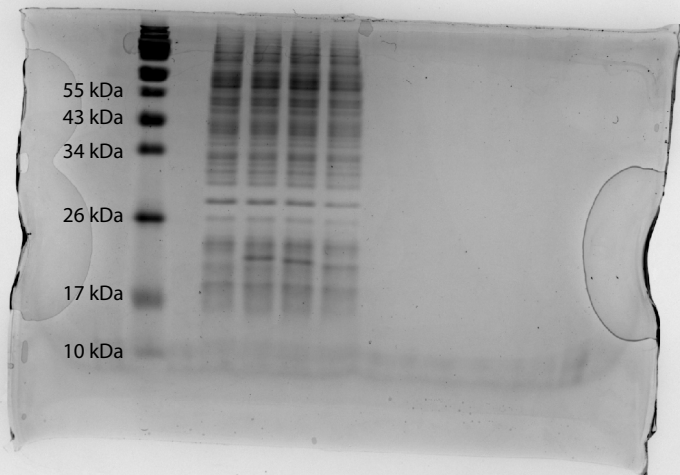

Supplement: supp [file elife-85579-supp-v1.zip]

A

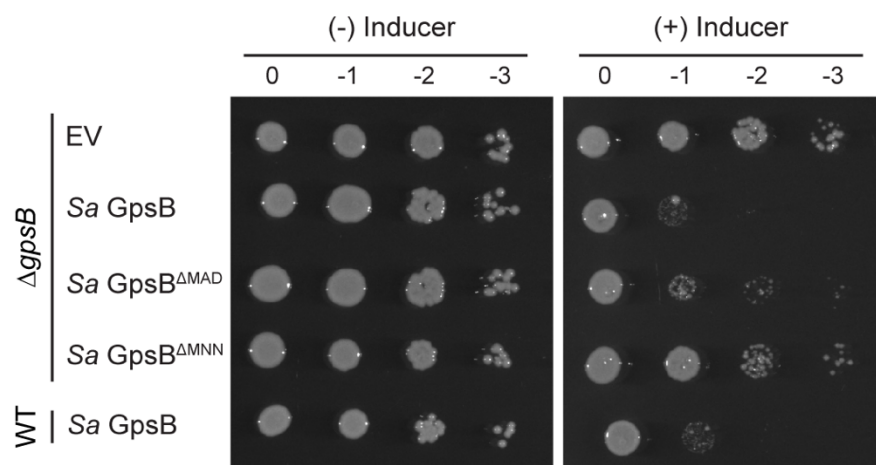

B

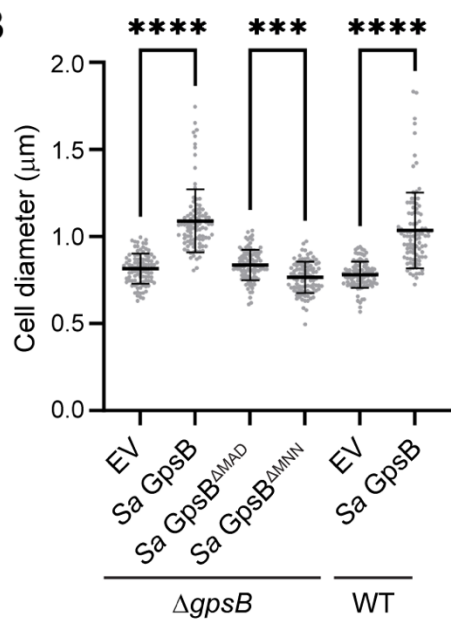

C

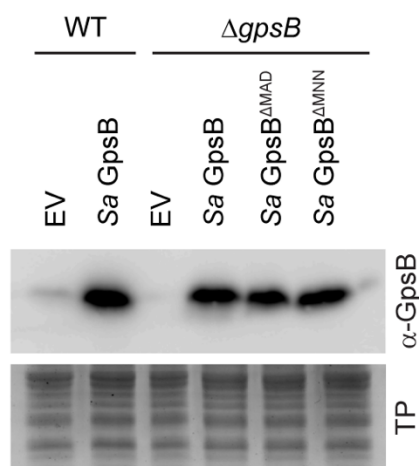

D

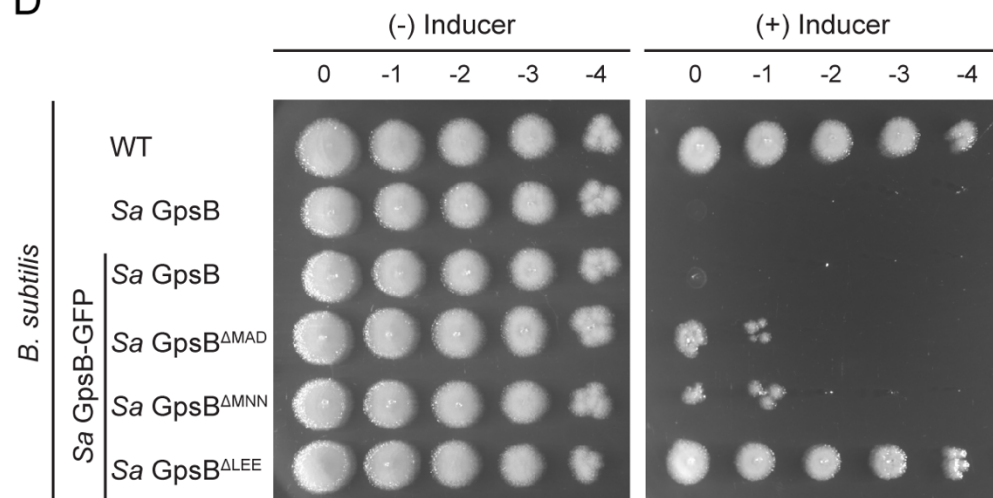

Supplement: supp [file elife-85579-supp-v1.zip]
